# Supplementary material
Source: PubMed Central journal article supplement (PMC6113456)
Supplement: zjm999096068s1.pdf [file zjm999096068s1.pdf]

**A flow through assay for rapid, bedside stratification of bloodstream bacterial infection in critically ill patients: a pilot study**

Pramod Jagtap<sup>1,#</sup>, Rohini Singh<sup>1,#</sup>, Karuna Deepika<sup>2</sup>, Venkataraman Sritharan<sup>2</sup> and Shalini Gupta<sup>1,\*</sup>

<sup>1</sup>*Dept. of Chemical Engineering, Indian Institute of Technology Delhi, India 110016*

<sup>2</sup>*Molecular Diagnostics and Biomarkers Lab, Gleneagles Global Hospitals, Lakdi ka pul, Hyderabad 500004*

<sup>#</sup>*Equal contribution*

**Supplementary Information**

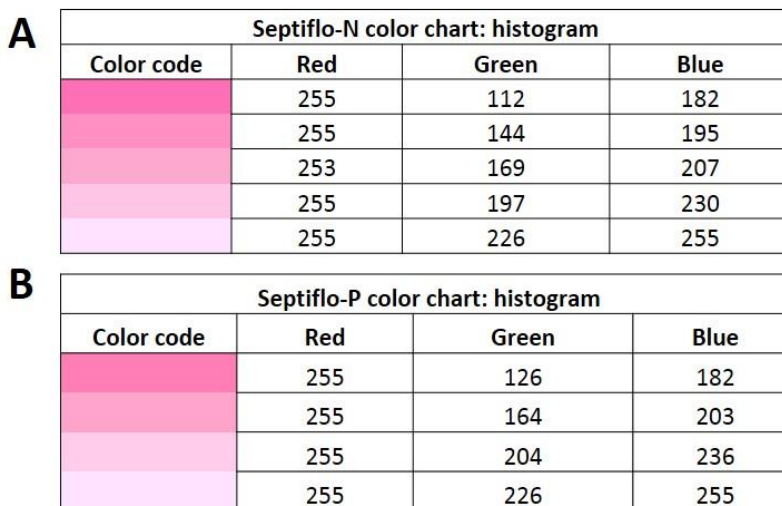

**Fig. S1.** Histogram color charts for (A) Septiflo-N and (B) Septiflo-P.

**Table S1:** PCR reagents and thermocycling conditions

| PCR Components               | Reagent (µl) |          | Thermal cycle conditions                                                                                                                         |
|------------------------------|--------------|----------|--------------------------------------------------------------------------------------------------------------------------------------------------|
|                              | Gram (-)     | Gram (+) |                                                                                                                                                  |
| Taq buffer                   | 2.5          | 2.5      | Initial denaturation: 95°C 5min<br>Denaturation: 95°C 30s<br>Annealing: 52.1°C 50s<br>Primer extension: 72°C 40s<br>Final extension: 72°C 10 min |
| 5 mM MgCl <sub>2</sub>       | 2.2          | 2.2      |                                                                                                                                                  |
| 2 mM dNTPs                   | 2            | 2        |                                                                                                                                                  |
| 50 picomoles forward primers | 1            | 2        |                                                                                                                                                  |
| 50 picomoles reverse primers | 1            | 2        |                                                                                                                                                  |

|                 |     |     |  |
|-----------------|-----|-----|--|
| Taq enzyme      | 0.7 | 0.7 |  |
| Template DNA    | 2   | 2   |  |
| Distilled water | 8.6 | 6.6 |  |
| Total volume    | 20  | 20  |  |

**Table S2:** Parametric optimization for the bioassay development

| <b>Parameters</b>                                       | <b>Reagents and conditions</b>                                                                                       | <b>Optimized parameters</b>                                    |
|---------------------------------------------------------|----------------------------------------------------------------------------------------------------------------------|----------------------------------------------------------------|
| Membranes                                               | SCNM-I, CX-1                                                                                                         | CX-1                                                           |
| Membrane surface blocking agent                         | BSA (0.5, 1, 2, 3 and 4 w/v %)                                                                                       | 1% w/v BSA                                                     |
| Incubation time for surface blocking agent              | 0.5, 1, 2, 3, and 4 min                                                                                              | 2 min                                                          |
| Membrane surface wetting agent                          | Tween 80 (0.1, 0.2, 0.3, 0.5, 1% v/v)<br>Tween 20 (0.1, 0.2, 0.3, 0.5, 1% v/v)<br>Pluronic F68 (0.1, 0.2, 0.5 % w/v) | 0.1% Tween 20 for Septiflo-P<br>1% Pluronic F68 for Septiflo-N |
| AuNP-conjugate passivating agent                        | PEG ( $10^2$ , .... $10^4$ M)<br>BSA (0.1 and 0.01% w/v)                                                             | PEG ( $1:10^4$ M)<br>(AuNP:PEG)                                |
| AuNP-conjugate concentration                            | 0.5 to 3 nM                                                                                                          | 1 nM AuNPs (Septiflo-P)<br>2 nM AuNPs (Septiflo-N)             |
| Number of AuNP-conjugate injections                     | 1 x 50 $\mu$ L<br>2 x 50 $\mu$ L and 3 x 50 $\mu$ L                                                                  | 2 injections                                                   |
| Incubation time (sample, surfactant and blocking agent) | 0.5, 1, 2, 3, and 4 min                                                                                              | 2 min                                                          |
| Washing step                                            | PF water (25, 50 and 100 $\mu$ L)                                                                                    | 50 $\mu$ L PF water                                            |

**Table S3:** Clinical data showing patient status. Note: The samples with PCT levels < 0.25 ng/mL were considered non-infectious/non-septic. Annotation: NA: Not available, N: Negative, Y: Positive, NE: Not elevated, NG: No growth, MRSA: Methicillin Resistant Staphylococcus aureus

| S.N. | PCT (ng/ml) | Neutrophils (%) | WBC (cells/ $\mu$ l) | Toxic granules | Platelets (lakhs/ $\mu$ l) | Blood culture | CRP (mg/L) | Gram +ve PCR | Gram-ve PCR | Septiflo |   | Sepsis status |
|------|-------------|-----------------|----------------------|----------------|----------------------------|---------------|------------|--------------|-------------|----------|---|---------------|
|      |             |                 |                      |                |                            |               |            |              |             | P        | N |               |
| 1    | 0.06        | 93%             | 9640                 | Present        | 2.76                       | NG            | NE         | N            | Y           | N        | Y | N             |
| 2    | 0.06        | 77%             | 15720                | Present        | 3.33                       | NA            | NA         | Y            | Y           | Y        | Y | N             |
| 3    | 0.07        | 63%             | 10050                | Present        | 3.87                       | NG            | 96         | NA           | NA          | N        | N | N             |
| 4    | 0.07        | 70%             | 15760                | Present        | 0.51                       | NA            | NA         | N            | N           | N        | N | N             |
| 5    | 0.08        | 60%             | 10090                | Present        | 1.66                       | MRSA          | 6          | Y            | Y           | Y        | Y | N             |
| 6    | 0.09        | 86%             | 13320                | Present        | 1.54                       | NG            | NE         | Y            | Y           | Y        | Y | N             |
| 7    | 0.11        | 73%             | 4570                 | Absent         | 1.88                       | NA            | NA         | N            | Y           | N        | Y | N             |
| 8    | 0.12        | 76              | 9410                 | Absent         | 2.01                       | NG            | 6 - 12     | NA           | NA          | N        | N | N             |
| 9    | 0.13        | 81%             | 11340                | Present        | 3.95                       | NA            | NA         | Y            | Y           | Y        | Y | N             |
| 10   | 0.13        | 76              | 5200                 | Absent         | 1.29                       | NG            | 24         | NA           | NA          | N        | N | N             |
| 11   | 0.13        | 87              | 6230                 | Present        | 1.59                       | NG            | NE         | NA           | NA          | N        | Y | N             |
| 12   | 0.13        | 80%             | 19320                | Present        | 3.23                       | NG            | NE         | N            | Y           | N        | N | N             |
| 13   | 0.14        | 61              | 6810                 | Absent         | 2.11                       | NA            | NE         | NA           | NA          | N        | N | N             |
| 14   | 0.15        | 58              | 9640                 | Absent         | 2.14                       | NG            | NE         | NA           | NA          | N        | N | N             |
| 15   | 0.15        | 62              | 7940                 | Absent         | 2.05                       | NA            | NA         | NA           | NA          | N        | Y | N             |
| 16   | 0.15        | 73              | 9320                 | Absent         | 3.13                       | NG            | NA         | NA           | NA          | Y        | N | N             |
| 17   | 0.15        | 65              | 8550                 | Absent         | 2.81                       | NA            | NA         | NA           | NA          | N        | N | N             |
| 18   | 0.17        | 79              | 7900                 | Absent         | 2.13                       | NA            | NA         | NA           | NA          | N        | Y | N             |
| 19   | 0.17        | 70              | 5140                 | Absent         | 1.9                        | NA            | NE         | NA           | NA          | N        | N | N             |
| 20   | 0.17        | 49              | 9270                 | Absent         | 2.25                       | NA            | NE         | NA           | NA          | N        | Y | N             |
| 21   | 0.18        | 60              | 6320                 | Absent         | 2.9                        | NA            | NE         | NA           | NA          | N        | Y | N             |
| 22   | 0.18        | 67              | 10550                | Absent         | 2.58                       | NA            | NE         | NA           | NA          | Y        | Y | N             |
| 23   | 0.18        | NA              | NA                   | NA             | NA                         | NA            | NA         | N            | Y           | N        | N | N             |
| 24   | 0.2         | 79%             | 7430                 | Present        | 0.67                       | NA            | NA         | N            | Y           | N        | Y | N             |
| 25   | 0.21        | 76%             | 22980                | Present        | 2.49                       | NA            | NA         | N            | Y           | N        | Y | N             |
| 26   | 0.21        | 74%             | 18670                | Absent         | 3.42                       | NG            | NA         | NA           | NA          | Y        | Y | N             |
| 27   | 0.25        | 80%             | 7600                 | Present        | 0.74                       | NG            | NA         | N            | Y           | N        | Y | Y             |
| 28   | 0.28        | 75 %            | 7640                 | Absent         | 1.5                        | NG            | 12         | N            | Y           | N        | Y | Y             |
| 29   | 0.3         | 70%             | 10140                | Present        | 1.69                       | NG            | NA         | N            | Y           | N        | Y | Y             |
| 30   | 0.33        | 88 %            | 12550                | Present        | 1.14                       | NG            | 24         | N            | Y           | N        | Y | Y             |
| 31   | 0.35        | 63              | 4550                 | Absent         | 3.67                       | NA            | NA         | NA           | NA          | Y        | Y | Y             |
| 32   | 0.5         | 76%             | 3460                 | NA             | 1.56                       | NG            | 24         | N            | Y           | N        | Y | Y             |
| 33   | 0.52        | 72%             | 10580                | Present        | 1.42                       | NA            | NA         | Y            | N           | Y        | N | Y             |
| 34   | 0.55        | 64%             | 7150                 | Present        | 0.49                       | NA            | NA         | NA           | NA          | Y        | Y | Y             |
| 35   | 0.58        | 91              | 11270                | Present        | 1.72                       | NA            | NA         | N            | Y           | N        | Y | Y             |
| 36   | 0.6         | 89%             | 21150                | Present        | 2.1                        | NG            | NA         | N            | Y           | N        | Y | Y             |
| 37   | 0.61        | 89%             | 9670                 | Present        | 2.04                       | NG            | NA         | N            | Y           | N        | Y | Y             |
| 38   | 0.67        | 81%             | 7680                 | Present        | 2.73                       | NA            | NA         | NA           | NA          | N        | Y | Y             |
| 39   | 0.7         | 75              | 13700                | Present        | 3.31                       | NA            | NE         | NA           | NA          | Y        | Y | Y             |
| 40   | 0.73        | 95%             | 5730                 | present        | 1.31                       | NA            | 48         | NA           | NA          | Y        | Y | Y             |
| 41   | 1.19        | 77%             | 13120                | Present        | 3.49                       | NA            | NA         | N            | N           | N        | N | Y             |
| 42   | 1.4         | 78%             | 28400                | Present        | 3.31                       | NG            | NA         | NA           | NA          | Y        | Y | Y             |
| 43   | 1.5         | 85%             | 16970                | Present        | 2.96                       | NG            | NA         | NA           | NA          | Y        | Y | Y             |
| 44   | 2.7         | 88%             | 9500                 | Present        | 1.21                       | NG            | 96         | NA           | NA          | Y        | Y | Y             |
| 45   | 3.9         | 36%             | 10020                | Present        | 3.42                       | NG            | 96         | NA           | NA          | Y        | Y | Y             |
| 46   | 4.11        | 92%             | 17460                | Present        | 3.5                        | NG            | NA         | N            | Y           | N        | Y | Y             |
| 47   | 6.14        | 80%             | 9460                 | Present        | 1.86                       | NA            | 192        | N            | Y           | N        | Y | Y             |
| 48   | 7.4         | 82%             | 11000                | Present        | 6.41                       | NG            | NA         | NA           | NA          | Y        | Y | Y             |
| 49   | 8.86        | 94%             | 29120                | Present        | 1.14                       | NG            | 192        | Y            | Y           | Y        | Y | Y             |
| 50   | 8.9         | 90%             | 10760                | Present        | 0.49                       | NG            | 192        | Y            | Y           | Y        | Y | Y             |
| 51   | 13.11       | 88%             | 17900                | Present        | 1.59                       | NG            | >384       | Y            | Y           | N        | Y | Y             |
| 52   | 14.6        | 93%             | 23220                | Present        | 1.24                       | NA            | 384        | Y            | Y           | N        | Y | Y             |
| 53   | 15.12       | 50%             | 9770                 | Absent         | 2.85                       | NG            | NA         | Y            | Y           | Y        | Y | Y             |
| 54   | 17.11       | 91%             | 16850                | Present        | 1.49                       | NG            | 192        | N            | Y           | N        | Y | Y             |
| 55   | 38.4        | 77%             | 9920                 | Present        | 2.22                       | NG            | 96         | NA           | NA          | N        | Y | Y             |

|    |       |     |       |         |      |         |    |    |    |   |   |   |
|----|-------|-----|-------|---------|------|---------|----|----|----|---|---|---|
| 56 | 65.5  | 90% | 13860 | Present | 0.47 | NG      | NA | N  | Y  | N | Y | Y |
| 57 | 97.9  | 90% | 12310 | Present | 0.21 | NG      | 96 | NA | NA | N | Y | Y |
| 58 | 109   | 76% | 9630  | Present | 1.1  | E. coli | 48 | NA | NA | Y | Y | Y |
| 59 | 150   | 79% | 6600  | Present | 2.91 | NG      | 96 | NA | NA | N | Y | Y |
| 60 | 663.8 | 76% | 2750  | NA      | 1.14 | NA      | 96 | Y  | Y  | Y | Y | Y |

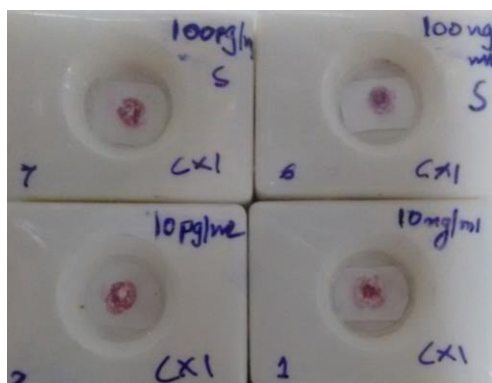

**Fig. S2.** Representative images for Septiflo assay performed without surfactant.

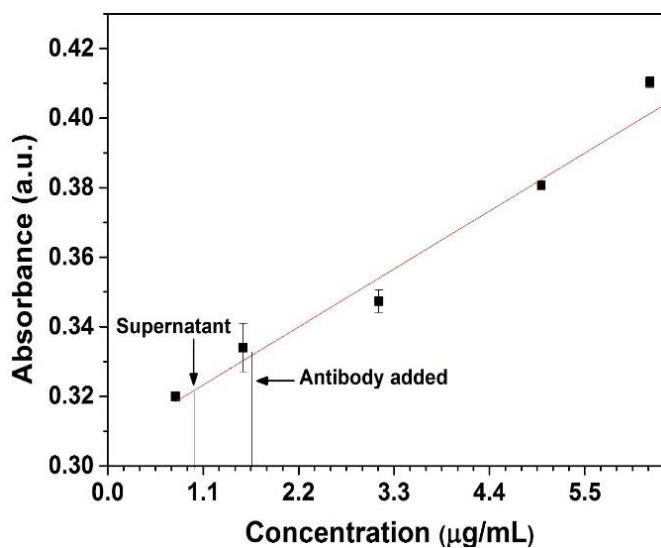

**Fig. S3.** Calibration graph obtained using Bradford's assay for the quantification of number of antibodies conjugated per AuNP. The results indicated AuNP:mAb molar ratio of  $\approx 1:6$ .

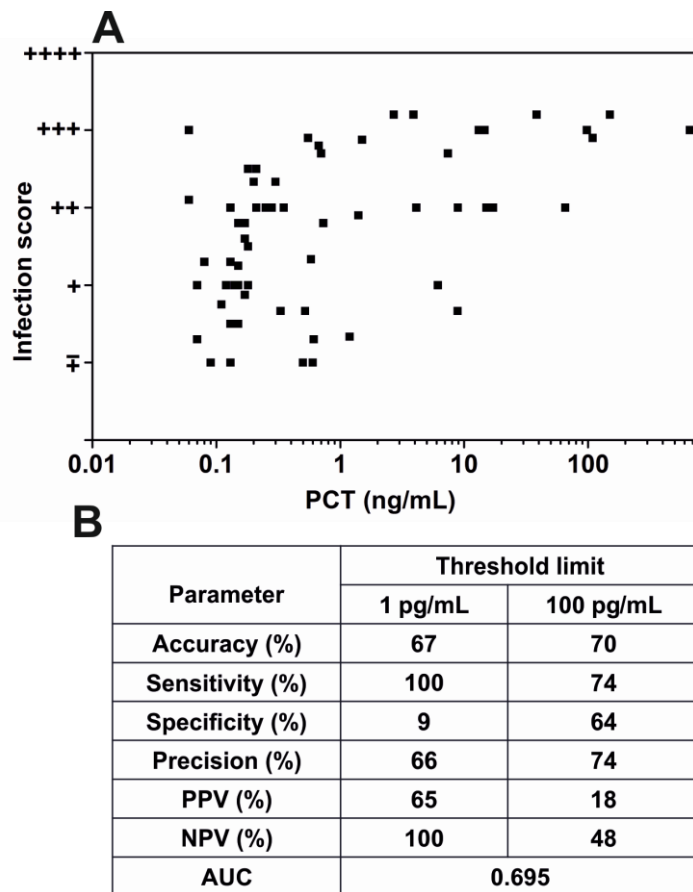

**Fig. S4.** (A) Correlation of total infection score against PCT values and (B) their performance characterization taking different LPS/LTA threshold limits (see Figs. S5 and S6 and Fig. S12 for ROC analysis). The total infection score was calculated by taking the higher of the Septiflo-N/P values.

**Definitions:**

$$\text{Accuracy} = (\text{TP} + \text{TN}) / \text{Total}$$

$$\text{Sensitivity} = \text{TP} / \text{Actual Yes}$$

$$\text{Specificity} = \text{TN} / \text{Actual No}$$

$$\text{Precision} = \text{TP} / \text{Predicted Yes}$$

$$\text{Positive predictive value (PPV)} = \text{TP} / \text{Predicted Yes}$$

$$\text{Negative predictive value (NPV)} = \text{TN} / \text{Predicted No}$$

where, TP = True Positive, TN = True Negative

| n = 60     | Predicted NO | Predicted YES |    |
|------------|--------------|---------------|----|
| Actual NO  | TN = 2       | FP = 20       | 22 |
| Actual YES | FN = 0       | TP = 38       | 38 |
|            | 2            | 58            | 60 |

**Fig. S5.** Performance classification of Septiflo assay against PCT based on the highest score of Septiflo-P/N and LPS/LTA <1 pg/mL threshold limit.

| n = 60     | Predicted NO | Predicted YES |    |
|------------|--------------|---------------|----|
| Actual NO  | TN = 11      | FP = 30       | 41 |
| Actual YES | FN = 12      | TP = 7        | 19 |
|            | 23           | 36            | 60 |

**Fig. S6.** Performance classification of Septiflo assay against PCT based on the highest score of Septiflo-P/N and LPS/LTA <100 pg/mL threshold limit.

| n = 31     | Predicted NO | Predicted YES |    |
|------------|--------------|---------------|----|
| Actual NO  | TN = 3       | FP = 0        | 3  |
| Actual YES | FN = 2       | TP = 26       | 28 |
|            | 5            | 26            | 31 |

**Fig. S7.** Performance classification of Septiflo-N against PCR assuming LPS < 1 pg/mL as threshold.

| n = 31        | Predicted<br>NO | Predicted<br>YES |    |
|---------------|-----------------|------------------|----|
| Actual<br>NO  | TN = 3          | FP = 0           | 3  |
| Actual<br>YES | FN = 7          | TP = 21          | 28 |
|               | 10              | 21               | 31 |

**Fig. S8.** Performance classification of Septiflo-N against PCR assuming LPS < 100 pg/mL as threshold.

| n = 31        | Predicted<br>NO | Predicted<br>YES |    |
|---------------|-----------------|------------------|----|
| Actual<br>NO  | TN = 20         | FP = 0           | 20 |
| Actual<br>YES | FN = 2          | TP = 9           | 11 |
|               | 22              | 9                | 31 |

**Fig. S9.** Performance classification of Septiflo-P against PCR assuming LTA < 1 pg/mL as threshold.

| n = 31        | Predicted<br>NO | Predicted<br>YES |    |
|---------------|-----------------|------------------|----|
| Actual<br>NO  | TN = 21         | FP = 0           | 21 |
| Actual<br>YES | FN = 5          | TP = 5           | 10 |
|               | 26              | 5                | 31 |

**Fig. S10.** Performance classification of Septiflo-P against PCR assuming LTA < 100 pg/mL as threshold.

| n = 21                           | No. of LTA negative cases | No. of LPS positive cases | Sensitivity |
|----------------------------------|---------------------------|---------------------------|-------------|
| Septiflo-N (100 pg/mL threshold) | 21                        | 13                        | 62%         |
| Septiflo-N (1 pg/mL threshold)   | 21                        | 17                        | 81%         |

**Fig. S11.** Out of a total of 21 LTA negative samples with high PCT levels, 62% tested positive for LPS (assuming 100 pg/mL LPS cut-off in blood) and 81% assuming 1 pg/mL cut-off. Of all the 31 patient samples tested with PCR, 96% cases (n=28) showed Gram-negative bacterial presence out of a total n=29 infection cases. This corroborated well with our Septiflo-N results which tested positive in 90% (n=26) of the total infection cases.

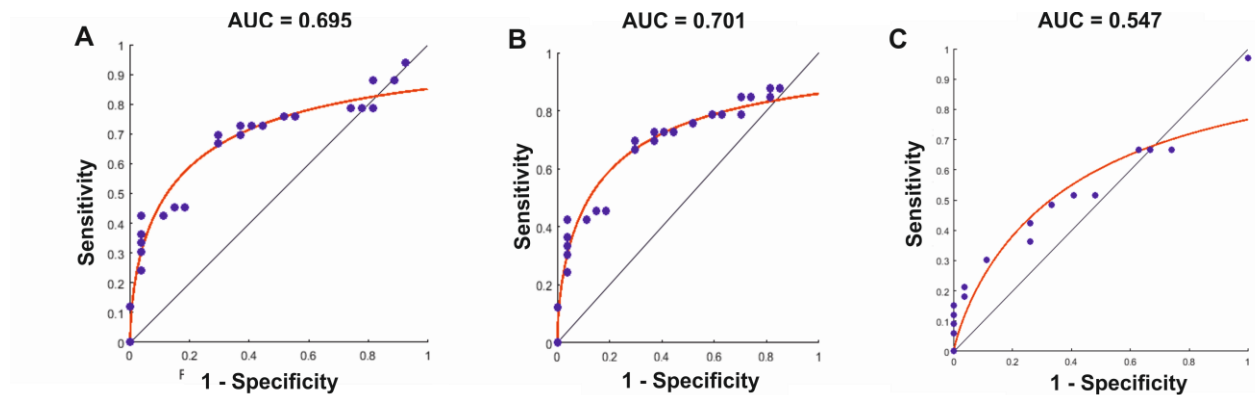

**Fig. S12.** Receiver operating characteristic (ROC) curves for (A) mixed infections, (B) Septiflo-N and (C) Septiflo-P, compared with PCT biomarker.



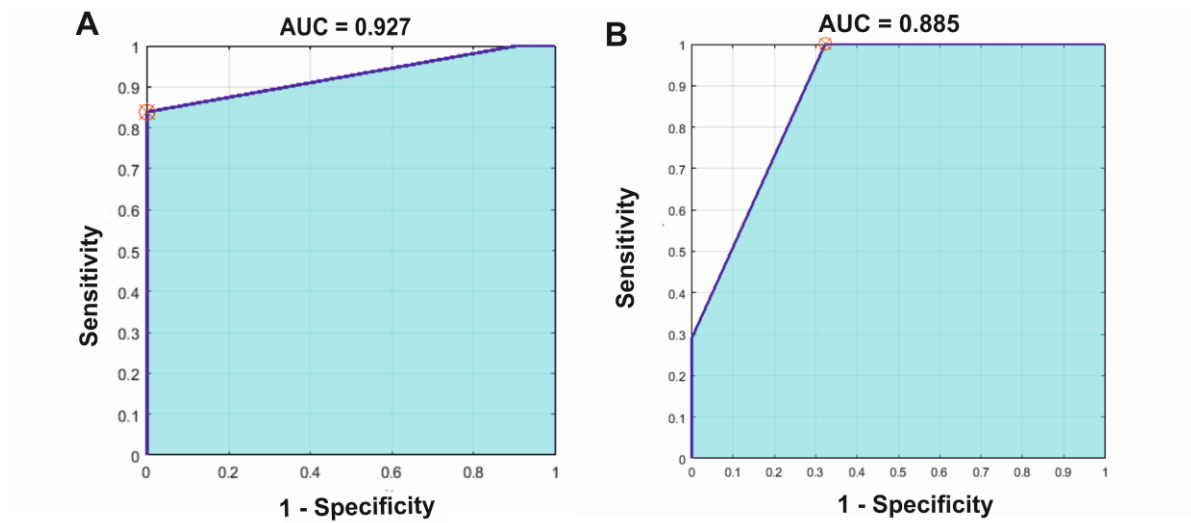

**Fig. S13.** ROC curves obtained for (A) Septiflo-N and (B) Septiflo-P using PCR as reference.
